# Supplementary material
Source: PubMed Central journal article supplement (PMC8502480)

## **Supplementary Materials**

### **Supplementary Methods**

#### Univariable and multivariable survival analyses

Cox-proportional hazards were used for OS estimates in univariable (UVA) and multivariable (MVA) analyses with hazard ratios (HR) and 95% confidence intervals (95%CI) reported. Patient-reported items with a frequency of  $\geq 20\%$  on PRO-CTCAE and matched clinician-reported items were included in UVA. A threshold of 20% was chosen as low frequency AE reporting would preclude robust statistical analyses. PRO-CTCAE and CTCAE items with a p-value of  $\leq 0.05$  in addition to RMI were included in MVA. Two-sided p-values of  $\leq 0.05$  were evaluated for all tests.

## Supplementary Tables

**Supplementary Table 1:** Survey attempts by number of respondents with adjustment for phase 1 study attrition.

| Survey Attempts | # Survey responses | Survey Responses/<br># Enrolled (N=243) | # of patients left on<br>Phase 1 study | Survey Responses/<br># patients left on study |
|-----------------|--------------------|-----------------------------------------|----------------------------------------|-----------------------------------------------|
| 1               | 243                | 100.0%                                  | 243                                    | *100%                                         |
| 2               | 192                | 78.6%                                   | 215                                    | *89.3%                                        |
| 3               | 117                | 48.6%                                   | 186                                    | *62.9%                                        |

Abbreviations: #, number

\*adjusted for phase 1 study attrition

**Supplementary Table 2:** Number of cycles received for phase 1 study treatment.

| Number of study drug cycles received | N   | %     |
|--------------------------------------|-----|-------|
| Total Number Evaluable               | 243 | 100   |
| Screen Fail                          | 24  | 9.9%  |
| <1 cycle                             | 12  | 5.5%  |
| 1 or more cycles                     | 207 | 94.5% |
| <2 cycles                            | 48  | 21.9% |
| 2 or more cycles                     | 171 | 78.1% |
| < 3 cycles                           | 99  | 45.2% |
| 3 or more cycles                     | 120 | 54.8% |

**Supplementary Table 3:** Grouped phase 1 study treatments by mono- or combination therapy.

| <b>Monotherapy</b>          | <b>N (%)</b> |
|-----------------------------|--------------|
| Targeted                    | 16.5%        |
| ICI                         | 7.0%         |
| Miscellaneous               | 4.1%         |
| Co-Stimulatory              | 2.9%         |
| Virus                       | 2.9%         |
| Vaccine                     | 2.1%         |
| Epigenetic                  | 1.6%         |
| Chemotherapy                | 0.4%         |
| <b>Combination therapy</b>  |              |
| ICI+ Co-Stimulatory         | 27.2%        |
| ICI + Immune Miscellaneous  | 12.8%        |
| ICI + Targeted              | 5.8%         |
| ICI + ICI                   | 4.1%         |
| Targeted + Targeted         | 4.1%         |
| ICI + Epigenetic            | 2.5%         |
| ICI + ICI + Co-Stimulatory  | 1.2%         |
| Target + Co-Stimulatory     | 1.2%         |
| Chemotherapy + Chemotherapy | 1.2%         |
| ICI + Vaccine               | 1.2%         |
| Targeted + Chemotherapy     | 0.8%         |
| Virus + Virus               | 0.4%         |

Abbreviations: ICI, Immune checkpoint inhibition

**Supplementary Table 4:** Number of prior clinical trials for patients enrolling in study.

| <b>Number of Prior Clinical Trials</b> | <b>N (%)</b> |
|----------------------------------------|--------------|
| 0                                      | 156 (64.2)   |
| 1                                      | 70 (28.8)    |
| 2                                      | 14 (5.8)     |
| 3                                      | 3 (1.2)      |

**Supplementary Table 5: Univariable survival analysis of patient characteristics**

| <b>Demographic</b>           | <b>HR (95% CI)</b> | <b>p-value</b> |
|------------------------------|--------------------|----------------|
| <b>Age</b>                   |                    |                |
| <65                          | [REF]              | 0.12           |
| ≥65                          | 1.33(0.93-1.90)    |                |
| <b>Gender</b>                |                    |                |
| Male                         | [REF]              | 0.65           |
| Female                       | 1.08(0.77-1.51)    |                |
| <b>ECOG</b>                  |                    |                |
| 0                            | [REF]              | 0.24           |
| ≥1                           | 1.29(0.84-1.98)    |                |
| <b>Treatment</b>             |                    |                |
| Monotherapy                  | [REF]              | 0.17           |
| Combination Therapy          | 0.78 (0.55-1.11)   |                |
| <b>Tumor Type</b>            |                    |                |
| Gastrointestinal             | [REF]              | 0.33           |
| Head and Neck                | 0.61(0.34-1.10)    |                |
| Breast                       | 0.93(0.52-1.69)    |                |
| Genitourinary                | 0.73(0.39-1.36)    |                |
| Gynecologic                  | 0.69(0.36-1.31)    |                |
| Other                        | 1.09(0.71-1.67)    |                |
| <b>Education</b>             |                    |                |
| Elementary                   | [REF]              | 0.51           |
| High School                  | 0.87(0.27-2.81)    |                |
| Post-Graduate                | 0.95(0.29-3.11)    |                |
| University                   | 1.16(0.36-3.71)    |                |
| <b>Prior Treatment Lines</b> |                    |                |
| 0-1                          | [REF]              | 0.24           |
| 2                            | 1.34(0.89-2.04)    |                |
| ≥3                           | 1.41(0.92-2.16)    |                |
| <b>Treatment Type</b>        |                    |                |
| Immune                       | [REF]              | 0.21           |
| Targeted                     | 1.40(0.96-2.06)    |                |
| Immune-Targeted Combo        | 1.19(0.68-2.09)    |                |
| <b>RMI Score</b>             |                    |                |
| 0-1                          | [REF]              |                |
| 2-3                          | 1.86 (1.31-2.64)   | <0.001         |

Abbreviations: HR, hazard ratio; ECOG, Eastern Cooperative Oncology Group; RMI, Royal Marsden Index

**Supplementary Table 6:** Univariable survival analysis and select ( $p < 0.05$  on univariable) multivariable survival analysis of patient (PRO-CTCAE) and clinician (CTCAE) reported symptomatic-AEs with an overall frequency  $\geq 20\%$  with inclusion of Royal Marsden Index score.

| Characteristic           | PRO-CTCAE        |         |                  |         | CTCAE             |         |                  |         |
|--------------------------|------------------|---------|------------------|---------|-------------------|---------|------------------|---------|
|                          | Univariable      |         | Multivariable    |         | Univariable       |         | Multivariable    |         |
|                          | HR (95% CI)      | p-value | HR (95% CI)      | p-value | HR (95% CI)       | p-value | HR (95% CI)      | p-value |
| RMI*                     |                  |         |                  |         |                   |         |                  |         |
| 2-3                      | 1.86 (1.31-2.64) | <0.001  | 2.04 (1.42-2.92) | <0.001  | 1.86 (1.31-2.64)  | <0.001  | 1.83 (1.29-2.54) | <0.001  |
| symptomatic-AE**         |                  |         |                  |         |                   |         |                  |         |
| abdominal pain           | 1.60 (1.13-2.23) | 0.01    | NS               | NS      | 1.49 (1.03-2.17)  | 0.03    | NS               | NS      |
| anorexia                 | 1.80 (1.28-2.52) | < 0.01  | 1.77 (1.26-2.51) | 0.001   | 1.41 (0.96-2.08)  | 0.08    |                  |         |
| anxiety                  | 1.41 (0.99-2.01) | 0.06    | ---              | ---     | 1.08 (0.68-1.72)  | 0.75    |                  |         |
| arthralgia               | 0.99 (0.70-1.42) | > 0.97  | ---              | ---     | 1.19 (0.70-2.00)  | 0.52    |                  |         |
| bloating                 | 1.16 (0.83-1.63) | 0.38    | ---              | ---     | 0.84 (0.41-1.72)  | 0.64    |                  |         |
| chills                   | 1.21 (0.83-1.79) | 0.33    | ---              | ---     | 4.07 (0.99-16.73) | 0.05    | NS               | NS      |
| concentration impairment | 1.29 (0.89-1.85) | 0.18    | ---              | ---     | 0.93 (0.23-3.75)  | 0.91    |                  |         |
| constipation             | 1.51 (1.07-2.13) | 0.02    | NS               | NS      | 1.79 (1.26-2.55)  | 0.00    | 1.70 (1.19-2.43) | 0.003   |
| cough                    | 0.80 (0.56-1.13) | 0.21    | ---              | ---     | 1.04 (0.69-1.56)  | 0.85    |                  |         |
| depression               | 1.63 (1.16-2.29) | 0.01    | 1.64 (1.15-2.32) | 0.006   | 1.18 (0.71-1.97)  | 0.52    |                  |         |
| diarrhea                 | 0.83 (0.58-1.20) | 0.32    | ---              | ---     | 0.74 (0.38-1.46)  | 0.39    |                  |         |
| xerostomia               | 0.92 (0.65-1.30) | 0.64    | ---              | ---     | 0.80 (0.42-1.52)  | 0.49    |                  |         |
| dry skin                 | 1.22 (0.87-1.70) | 0.25    | ---              | ---     | 0.92 (0.38-2.24)  | 0.85    |                  |         |
| dysgeusia                | 1.41 (0.97-2.06) | 0.07    | ---              | ---     | 1.18 (0.58-2.41)  | 0.65    |                  |         |
| dyspepsia                | 1.28 (0.89-1.84) | 0.19    | ---              | ---     | 0.94 (0.57-1.57)  | 0.82    |                  |         |
| fatigue                  | 1.00 (0.68-1.46) | > 0.95  | ---              | ---     | 1.28 (0.92-1.82)  | 0.15    |                  |         |
| headache                 | 1.05 (0.73-1.51) | 0.81    | ---              | ---     | 0.68 (0.41-1.12)  | 0.13    |                  |         |
| dysphonia                | 1.01 (0.68-1.50) | > 0.95  | ---              | ---     | 1.11 (0.35-3.49)  | 0.86    |                  |         |
| hyperhidrosis            | 1.31 (0.90-1.91) | 0.16    | ---              | ---     | 2.85 (0.70-11.59) | 0.14    |                  |         |
| insomnia                 | 1.18 (1.84-1.66) | 0.35    | ---              | ---     | 1.44 (1.02-2.03)  | 0.04    | NS               | NS      |
| memory impairment        | 1.26 (0.89-1.78) | 0.20    | ---              | ---     | 1.00              | > 0.95  |                  |         |
| myalgia                  | 1.33 (0.95-1.87) | 0.10    | ---              | ---     | 0.96 (0.24-3.87)  | > 0.95  |                  |         |
| nausea                   | 1.44 (1.00-2.08) | 0.05    | NS               | NS      | 1.57 (1.03-2.40)  | 0.04    | 1.61 (1.05-2.44) | 0.03    |
| pruritus                 | 0.96 (0.64-1.43) | 0.83    | ---              | ---     | 0.57 (0.21-1.55)  | 0.27    |                  |         |
| pain (general)           | 1.23 (0.85-1.78) | 0.28    | ---              | ---     | 1.10 (0.79-1.54)  | 0.58    |                  |         |
| tinnitus                 | 0.91 (0.60-1.38) | 0.66    | ---              | ---     | 0.76 (0.31-1.85)  | 0.54    |                  |         |
| urinary frequency        | 1.35 (0.95-1.93) | 0.10    | ---              | ---     | 0.92 (0.29-2.90)  | 0.88    |                  |         |
| peripheral neuropathy    | 1.16 (0.83-1.62) | 0.49    | ---              | ---     | 1.29 (0.90-1.86)  | 0.16    |                  |         |
| dyspnea                  | 1.35 (0.97-1.89) | 0.08    | ---              | ---     | 1.27 (0.89-1.83)  | 0.19    |                  |         |

Abbreviations: HR, Hazard Ratio; CI, confidence intervals; AE, adverse event; RMI, Royal Marsden Index; NS, not significant

\*RMI reference = 0-1.

\*\*symptomatic-AE reference = absence

\*\*\*decreased libido excluded due to omitted data including not applicable (N/A) and prefer not to answer (PNTA).

## Supplementary Figures

Supplementary Figure 1: Consort Diagram

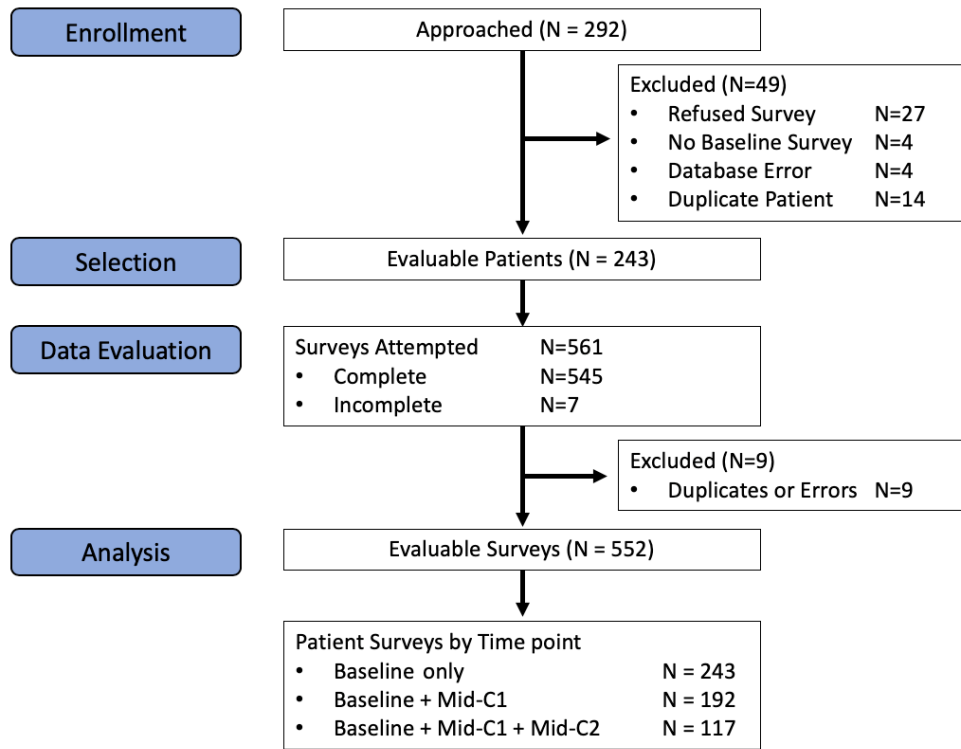

Supplementary Figure 2: Study design

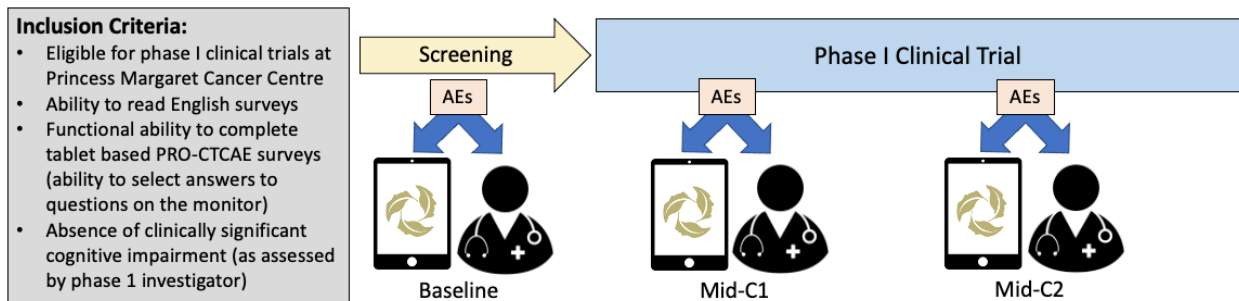

**Supplementary Figure 3:** Difference\* between patient (PRO-CTCAE; blue) and clinician (CTCAE; yellow\*\*) overall symptomatic adverse event reporting ( $\geq 10\%$ ).

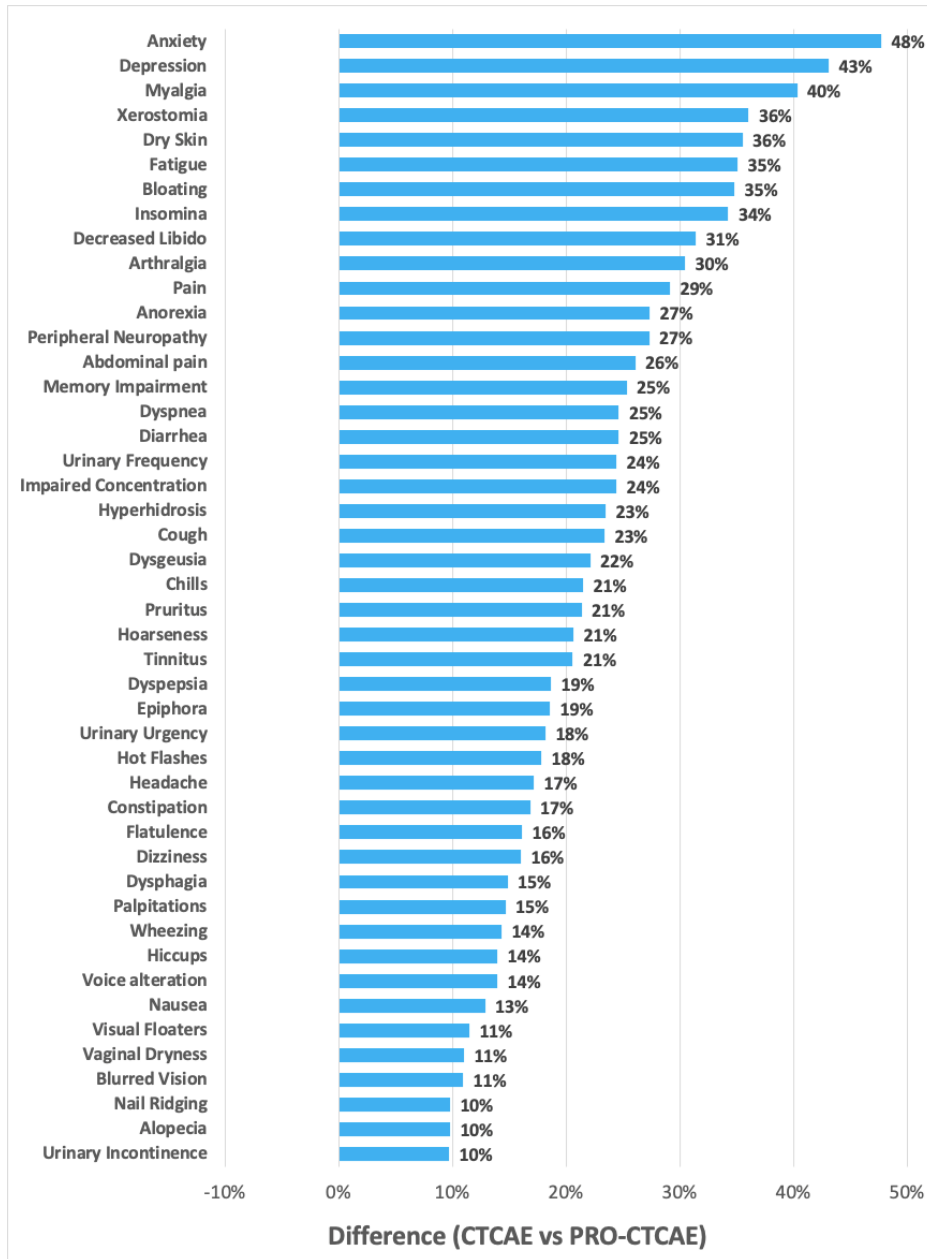

\*Calculation for individual AE percentage difference

[ex: fatigue = PRO-CTCAE sy-AE% - CTCAE sy-AE% = % Difference].

\*\*No clinician-reported symptomatic-AEs were reported at a higher frequency than patient-reported symptomatic AEs.

**Supplementary Figure 4: Kaplan-Meier survival curves**

**A:** Overall survival for patients receiving at least 1 dose of phase 1 study medication. Median OS = 9.4 (95%CI: 7.3-11.3) months. Median follow up time is 8.1 months.

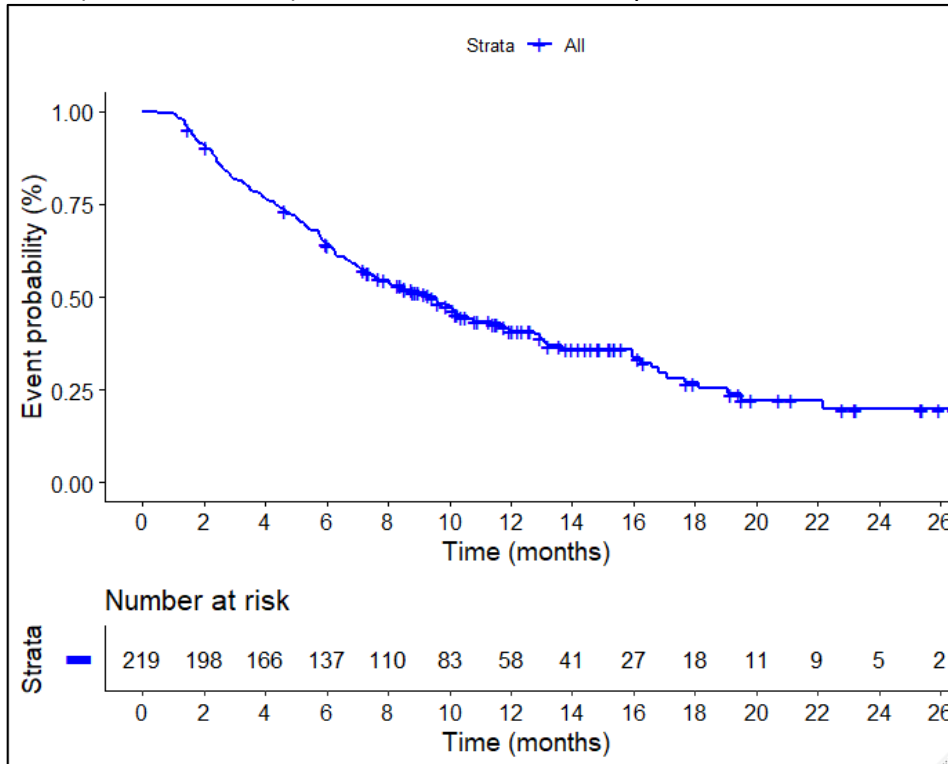

**B:** Overall survival for all patients enrolled on study. Median OS = 8.4 (95%CI: 6.5-10.8) months. Median follow up time is 7.7 months.

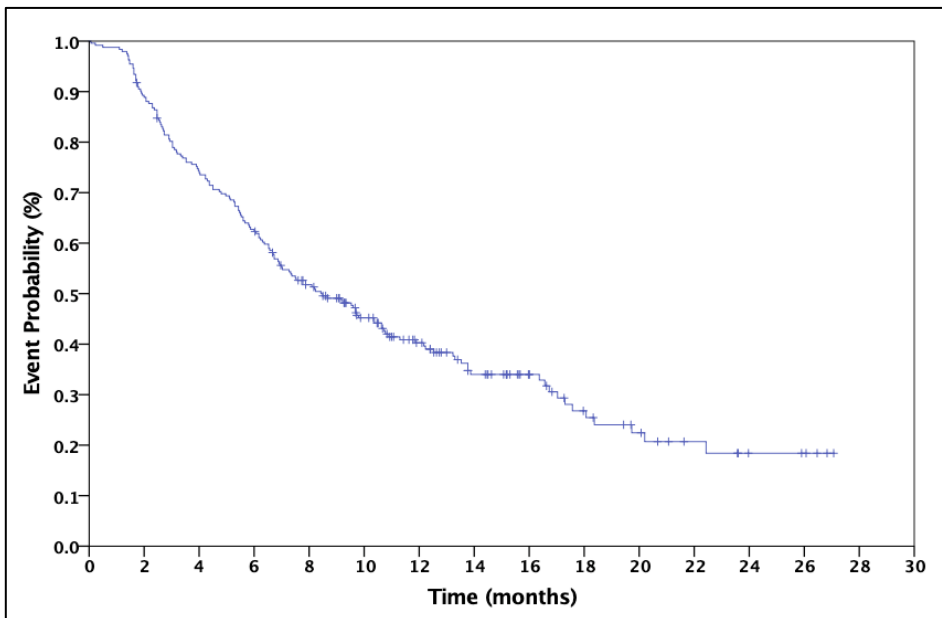



**C:** Subgroup analysis of patient (PRO-CTCAE) evaluation of median number of toxicities for  $\leq 11$  AEs (blue) versus  $>11$  AEs (red). No significant difference ( $p=0.69$ )

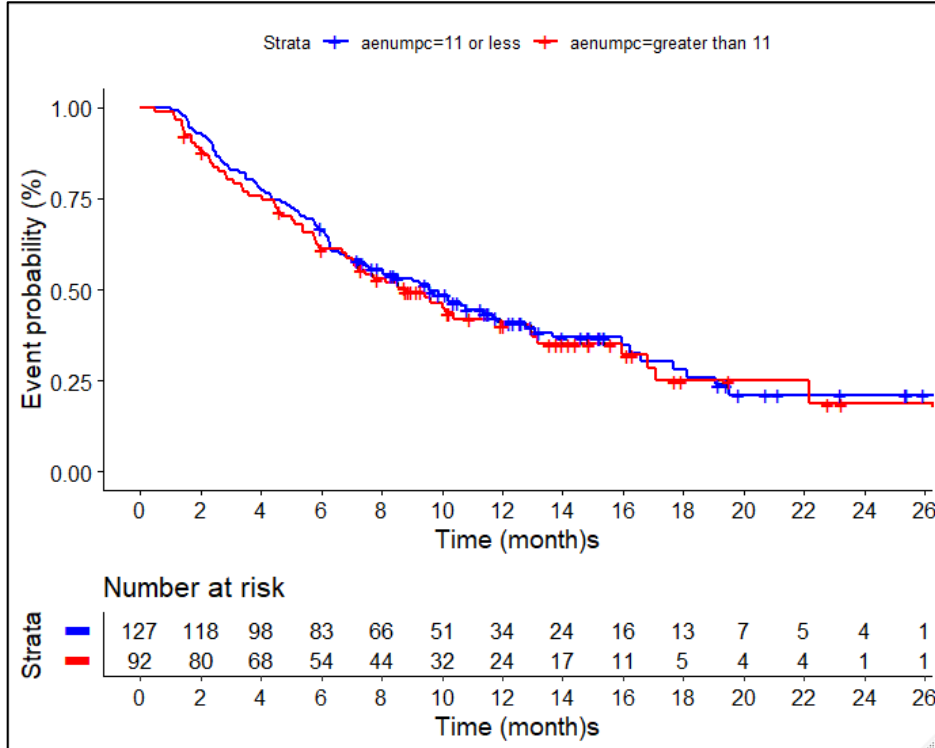

**D:** Subgroup analysis of physician (CTCAE) evaluation of toxicity for patients having  $\leq 3$  symptomatic-AEs (blue) versus  $>3$  (red) symptomatic-AEs. Median OS was 10.6 (95%CI: 8.1-16.6) months and 7.2b(95% CI: 5.8-10.0) months respectively. Significant difference HR 1.48 (95% CI: 1.06-2.06),  $p=0.03$

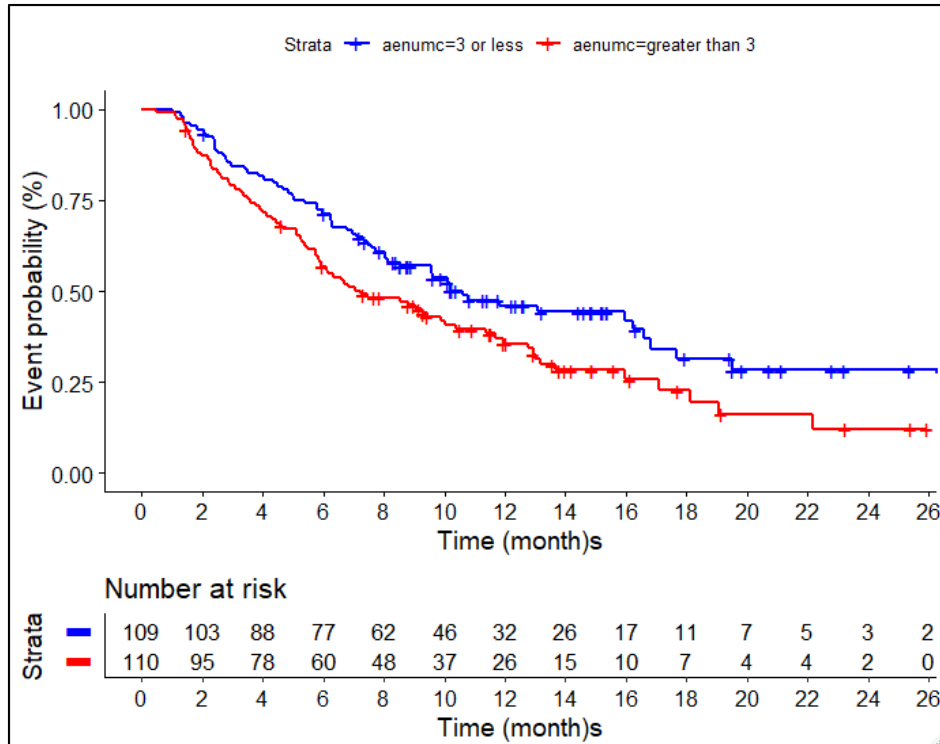

**E:** Subgroup analysis of patient survival by Royal Marsden Index (RMI) score. Median OS for RMI (0-1)[blue] is 10.4 (95% CI: 8.5-13.7) months and median OS for RMI (2-3) [red] is 5.8 (95%CI: 4.1-8.6) months (p<0.001).

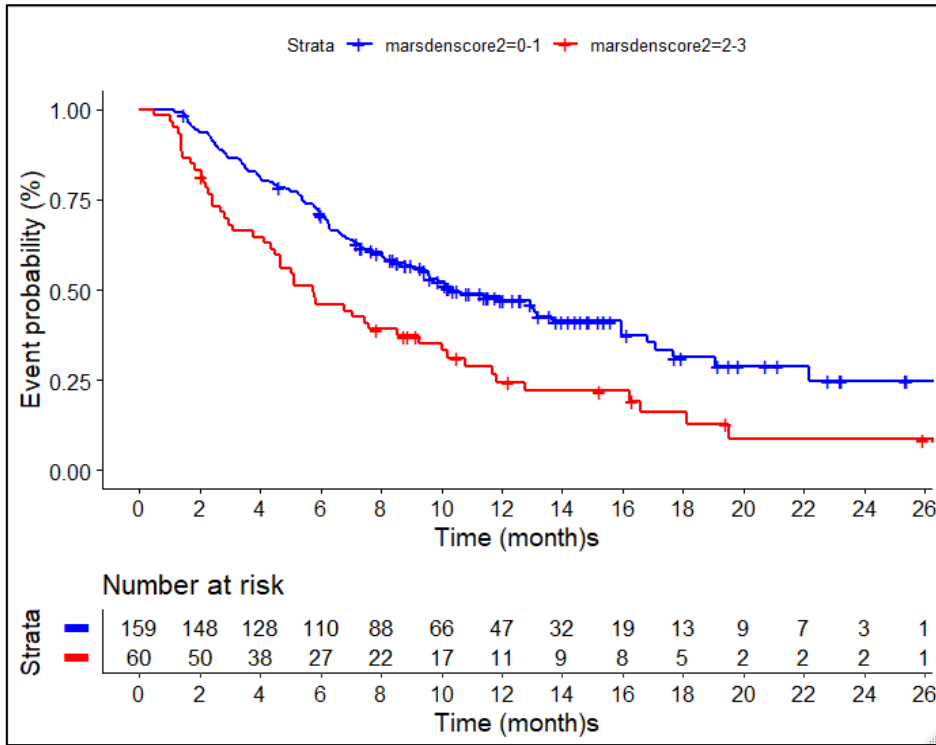

Supplement: djab015_supplementary_data.pdf [file djab015_supplementary_data.pdf]
